# Supplementary material for: Network Analysis Indicating the Pharmacological Mechanism of Yunpi-Qufeng- Chushi-Prescription in Prophylactic Treatment of Rheumatoid Arthritis
Source: Research Square preprint supplement (doi:10.21203/rs.3.rs-148147/v1), 2021-01-25
Supplement: Supplementary file 1 [file 5e69cba11abc384970c2cb7c.docx]

Table1. Full scientific species names of herbs of Yunpi-Qufeng-Chushi-Prescription

| Pin Yin | Latin Name |
| --- | --- |
| Cang Zhu | Atractylodes lancea |
| fang feng | Saposhnikovia divaricata |
| qing feng teng | Sinomenium acutum |
| jin yin hua | Lonicera japonica |
| hu zhang | Polygonum cuspidatum |
| yi yi ren | Coix lacryma- jobi var. ma - yuen |
| Xu Chang Qing | Cynanchum paniculatum |
| Zhi Gan Cao | Radix Glycyrrhizae Preparata |
| Tu Fu Ling | Smilax glabra |
| Kun Ming Shan Hai Tang | Tripterygium hypoglaucum |
| Tu Si zi | Semen Cuseutae |

Table 2. The binding energy of autodock.

| Tatgets | chlorogenic acid (kcal·mol-1) | polydatin (kcal·mol-1) | prim-O-glucosylcimifugin (kcal·mol-1) | sinomenine (kcal·mol-1) | liquiritin (kcal·mol-1) |
| --- | --- | --- | --- | --- | --- |
| C2 | -3.75 | -4.90 | -4.13 | -5.28 | -6.26 |
| C3 | -7.30 | -9.41 | -8.18 | -9.42 | -9.49 |
| IGF1R | -5.19 | -6.48 | -4.38 | -6.05 | -5.27 |
| MMP9 | -4.09 | -4.96 | -5.39 | -6.21 | -4.47 |
| SRC | -5.05 | -5.09 | -4.40 | -6.76 | -5.50 |
| KIT | -6.18 | -7.35 | -7.36 | -6.80 | -7.87 |
| EGFR | -5.35 | -4.90 | -5.43 | -5.21 | -4.38 |
